# Supplementary material for: Dendrimeric antigen–silica particle composites: an innovative approach for IgE quantification
Source: Royal Society of Chemistry journal article supplement (doi:10.1039/c3tb20548g), 2013-01-01
Supplement: c3tb20548g.pdf [file c3tb20548g.pdf]

## Electronic Supplementary Material

### Dendrimeric Antigens-Silica Particles Composites: An Innovative Approach for IgE Quantification.

Yolanda Vida,<sup>a,b,‡</sup> Maria I. Montañez,<sup>a,c,‡</sup> Daniel Collado,<sup>a,b</sup> Francisco Nájera,<sup>a,b</sup> Adriana Ariza,<sup>a,c</sup> Miguel Blanca<sup>a,d</sup> Maria J. Torres,<sup>a,d</sup> Cristobalina Mayorga<sup>a,c</sup> and Ezequiel Perez-Inestrosa<sup>\*a,b</sup>

<sup>a</sup> Andalusian Centre for Nanomedicine and Biotechnology-BIONAND, Parque Tecnológico de Andalucía, 29590 Málaga, Spain. Tel: +34 952 367 609; E-mail: inestrosa@uma.es

<sup>b</sup> Department of Organic Chemistry, Faculty of Sciences, University of Málaga, 29071 Málaga, Spain. Fax: +34 952131941; Tel: +34 952137565; E-mail: inestrosa@uma.es

<sup>c</sup> Research laboratory, Carlos Haya Hospital, 29009 Málaga, Spain

<sup>d</sup> Allergy Service, Carlos Haya Hospital, 29009 Málaga, Spain

<sup>‡</sup>These authors contributed equally to this work

#### Table of Contents.

1. TEM images of the obtained particles
2. Calculation of numbers of spheres and surface area per gram of SiO<sub>2</sub>
3. Calculation of functional groups in the spheres

#### 1. TEM images of the obtained particles

A suspension of monodisperse sub-micron silica-based spheres was obtained following the Stöber's standard method.

It is found from figure 1 that no clear differences in size and morphology between SiO<sub>2</sub> and SiO<sub>2</sub>-DG<sub>2</sub> were observed, suggesting: 1) the additional organic group does not increase the volume of the inorganic particle obviously and 2) no aggregation occurs during the surface modification process.

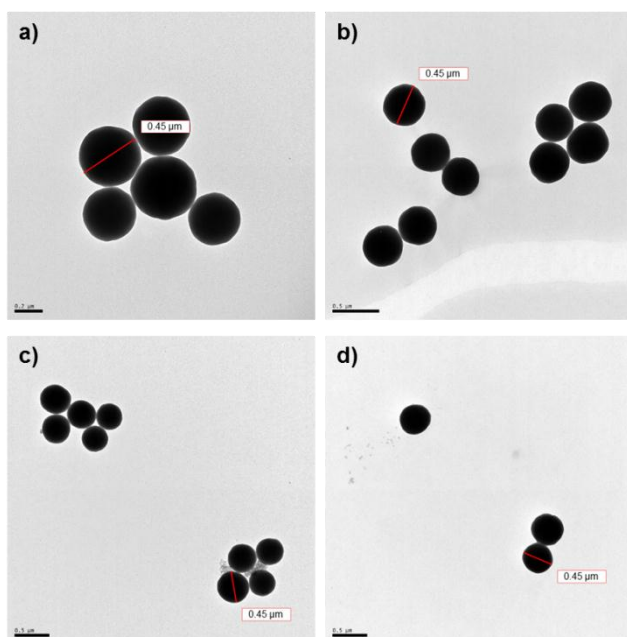

Figure S1. TEM images of the obtained particles: a) SiO<sub>2</sub>; b) SiO<sub>2</sub>-APS; c) SiO<sub>2</sub>-Suc; d) SiO<sub>2</sub>-DG<sub>2</sub>.

## 2. Calculation of numbers of spheres and surface area per gram of SiO<sub>2</sub>.

Values were calculated on the assumption that the silica particles were perfect spheres of 2.2 g/cm<sup>3</sup> density.

Density of SiO<sub>2</sub> particles: 2.2 g/cm<sup>3</sup>

Diameter of 1 sphere = 450 nm

Volume of 1 sphere:  $\frac{4}{3}\pi r^3$ ;  $V = \frac{4}{3}\pi(450/2 \text{ nm})^3 = 47.7 \times 10^6 \text{ nm}^3$

Mass of 1 sphere:  $47.7 \times 10^6 \text{ nm}^3 \times 2.2 \cdot \text{g}/10^{-21} \text{ nm}^3 = 1.05 \times 10^{-13} \text{ g}$

Number of spheres per gram of SiO<sub>2</sub> sample:

$$1 \text{ g} \times 1 \text{ sphere}/1.05 \times 10^{-13} \text{ g} = 9.5 \times 10^{12} \text{ spheres}$$

Area of 1 sphere:  $4\pi r^2$ ;  $A = 4\pi(450/2 \text{ nm})^2 = 63.6 \times 10^4 \text{ nm}^2$

Surface area per gram of SiO<sub>2</sub> sample:

$$63.6 \times 10^4 \text{ nm}^2/\text{sphere} \times 9.5 \times 10^{12} \text{ spheres} = 6.1 \times 10^{18} \text{ nm}^2$$

## 3. Calculation of functional groups in the spheres.

30 μmol amino groups per gram of SiO<sub>2</sub>-DG<sub>2</sub> sample.

PAMAM-G2 per gram of SiO<sub>2</sub>-DG<sub>2</sub> sample:

30 μmol amino groups x 1 μmol PAMAM-G2/15 μmol amino groups = 2 μmol

PAMAM-G2

$2 \times 10^{-6} \text{ mol PAMAM-G2} \times 6.02 \times 10^{23} \text{ PAMAM-G2/mol PAMAM-G2} = 12 \times 10^{17}$

PAMAM-G2

PAMAM-G2 per nm<sup>2</sup>:

$$12 \times 10^{17} \text{ PAMAM-G2/g SiO}_2 \times 1 \text{ g SiO}_2/6.1 \times 10^{18} \text{ nm}^2 = 0.2 \text{ PAMAM-G2/nm}^2$$
